# Supplementary material for: The Recovery of Plastid Function Is Required for Optimal Response to Low Temperatures in Arabidopsis
Source: PubMed Central journal article supplement (PMC4569060; doi:10.1371/journal.pone.0138010), 2015-09-14
Supplement: pone.0138010.s002.pdf [file pone.0138010.s002.pdf]

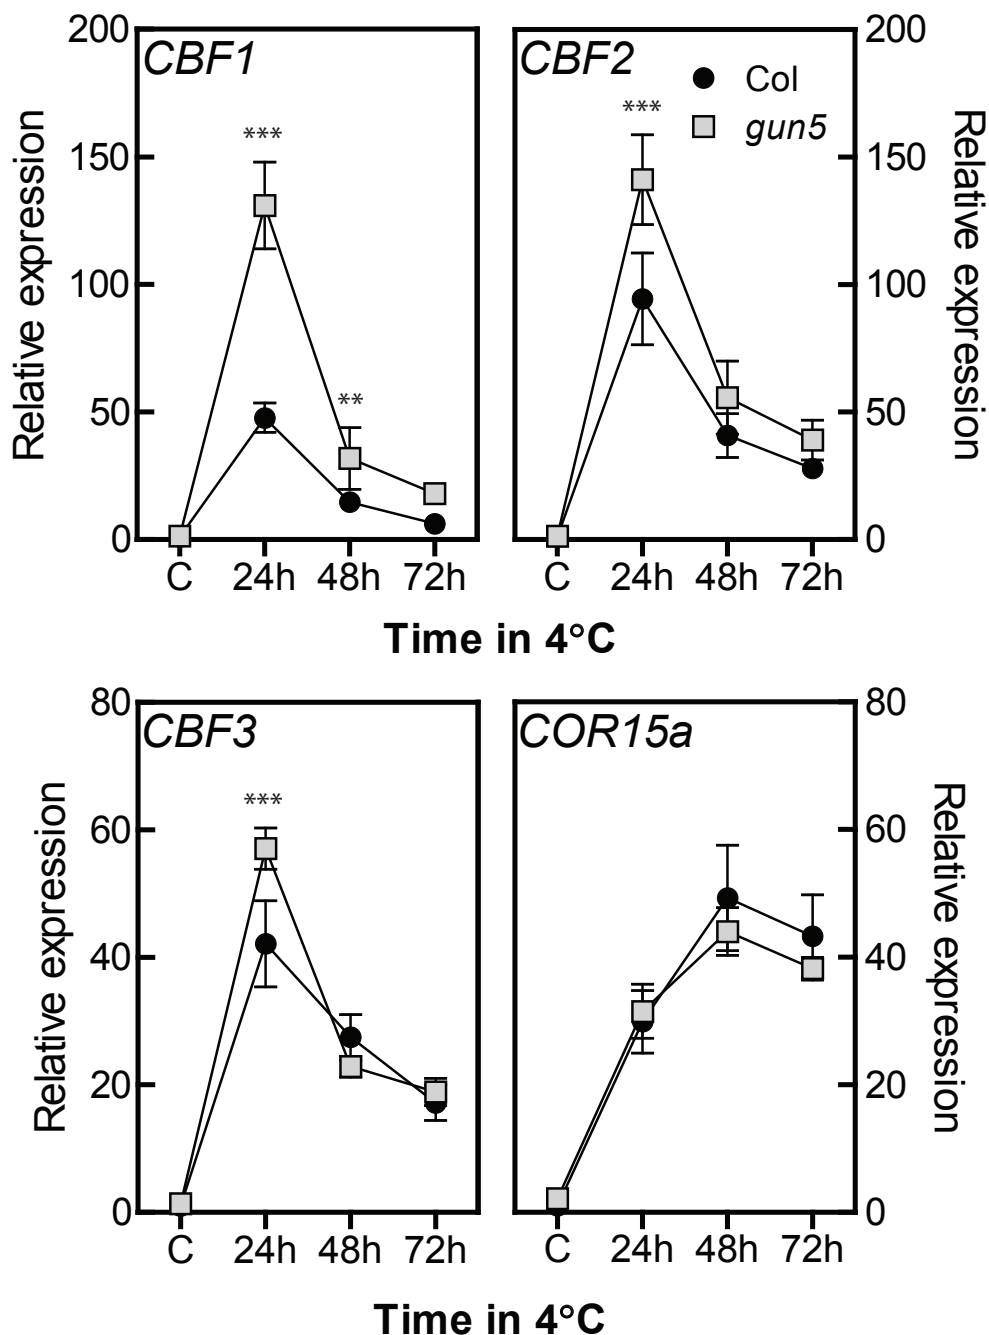

**S2 Fig. Expression of *CBF1-3* and *COR15a* in Col-0 and the *gun5* mutant.**

5-week old plants grown in SD conditions were transferred to SD conditions, 4°C, for indicated times. Extracted total RNA was DNase treated and cDNA synthesised. Levels of *CBF1* (At4g25490), *CBF2* (At4g25470), *CBF3* (At4g25480) and *COR15a* (At2g42540) were related to the transcript levels of the respective warm grown control. Ubiquitin-like protein (At4g36800) was used as internal control. Data is from at least 3 independent replicates and show mean ( $\pm$  SD). Significant differences were determined with two-way ANOVA with Bonferroni post-tests,  $p < 0.01$  (\*\*),  $p < 0.001$  (\*\*\*)
