# Supplementary material for: The Recovery of Plastid Function Is Required for Optimal Response to Low Temperatures in Arabidopsis
Source: PubMed Central journal article supplement (PMC4569060; doi:10.1371/journal.pone.0138010), 2015-09-14
Supplement: pone.0138010.s003.pdf [file pone.0138010.s003.pdf]

## S3 Fig

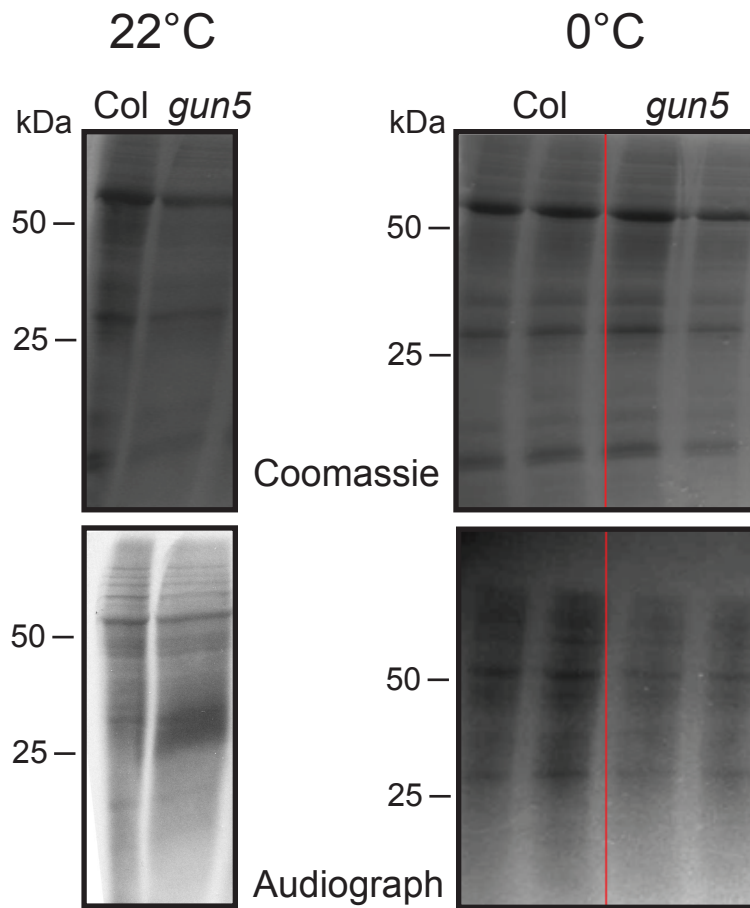

### S3 Fig. Gel images of the <sup>35</sup>S experiment.

3 week old plants were grown at SD conditions, 22°C, pretreated at 0°C for 4 days and labelled with [<sup>35</sup>S]Met and [<sup>35</sup>S]Cys. The plants were then transferred to either 22°C or 0°C for 36 hours. Plants were briefly rinsed with water and total proteins were extracted and run on a SDS-PAGE. The gel was stained (top panels), dried, exposed to an X-ray film and developed (bottom panels).
