# Supplementary material for: The Recovery of Plastid Function Is Required for Optimal Response to Low Temperatures in Arabidopsis
Source: PubMed Central journal article supplement (PMC4569060; doi:10.1371/journal.pone.0138010), 2015-09-14
Supplement: pone.0138010.s004.pdf [file pone.0138010.s004.pdf]

**Supplementary table 1.** Primers used in this study

| <b>Gene</b>    | <b>Locus</b>     | <b>Forward primer</b>    | <b>Reverse primer</b>       |
|----------------|------------------|--------------------------|-----------------------------|
| <i>CBF1</i>    | <b>AT4G25490</b> | GCCAAACAAGAAAACCAGGA     | TCAGCGAAGTTGAGACATGC        |
| <i>CBF2</i>    | <b>AT4G25470</b> | TGACGTGTCCTTATGGAGCTA    | CTGCACTCAAAAACATTTGCA       |
| <i>CBF3</i>    | <b>AT4G25480</b> | GATGACGACGTATCGTTATGGA   | TACTACTCGTTTCTCAGTTTTACAAAC |
| <i>COR15a</i>  | <b>AT2G42540</b> | AACGAGGCCACAAAGAAAGC     | CAGCTTCTTTACCCAATGTATCTGC   |
| <i>COR47</i>   | <b>AT1G20440</b> | ACAAGCCTACTGTCATCGAAAAGC | TCTTCATCGCTCGAAGAGGAAG      |
| <i>COR78</i>   | <b>AT5G52310</b> | GATGCACCAGGCGTAACAGGT    | GTCCTTACAGAATGAGCCGG        |
| <i>LHCB1.1</i> | <b>AT1G29920</b> | CGGAAAGTGAGCCAAGTTCT     | TGAAAGTCTCTACCATCCACCA      |
| <i>LHCB2.4</i> | <b>AT3G27690</b> | GCCATCCAACGATCTCCTC      | TGGTCCGTACCAGATGCTC         |
| <i>GUN4</i>    | <b>AT3G59400</b> | CTTACACACACCACCGCAAC     | AGGTGGAAGAAGCAGAGCAG        |
| <i>CHLH</i>    | <b>AT5G13630</b> | CCTAGAACAGGGAAGTCACA     | CAGGTGGGAAACTGAAAACAG       |
| <i>PsbA</i>    | <b>ATCG00020</b> | ATACAACGGCGGTCCTTATG     | GTATGCGTCCTTGGATTGCT        |
